# Supplementary material for: Skin-Friction and Forced Convection from Rough and Smooth Plates
Source: MDPI journal article supplement (doi:10.3390/thermo3040040), 2023-12-16
Supplement: s1 [file s1]

This directory contains comma-separated- or tab-separated-values files to accompany *Skin-Friction and Forced Convection from Rough and Smooth Plates* by Aubrey Jaffer.

**Table S1 Sources of friction measurements**

| Source                       | Filename             | $Pr_\infty$ | $Re \geq$         | $Re \leq$            | $\pm$ | Count |
|------------------------------|----------------------|-------------|-------------------|----------------------|-------|-------|
| [1, 2, 3] Churchill          | Churchill-smooth.tsv | 0.71        | $1.0 \times 10^5$ | $1.0 \times 10^9$    |       | 9     |
| [1, 2, 3] Churchill          | Churchill-local.tsv  | 0.71        | $1.0 \times 10^5$ | $1.0 \times 10^{10}$ |       | 11    |
| [4] Žukauskas & Šlančiauskas | ZSSF.csv, group 3    | 55.2        | $3.6 \times 10^5$ | $1.1 \times 10^7$    |       | 5     |
| [4] Žukauskas & Šlančiauskas | ZSSF.csv, group 2    | 5.42        | $3.6 \times 10^5$ | $2.4 \times 10^6$    |       | 8     |
| [4] Žukauskas & Šlančiauskas | ZSSF.csv, group 1    | 2.78        | $7.2 \times 10^5$ | $4.4 \times 10^6$    |       | 8     |
| [4] Žukauskas & Šlančiauskas | ZSSF.csv, group 0    | 0.71        | $7.6 \times 10^5$ | $3.2 \times 10^6$    |       | 9     |
| [5, 6, 7] Gebers             | Gebers.csv           |             | $7.4 \times 10^5$ | $3.3 \times 10^7$    |       | 33    |
| [8] Pimenta et al.           | Pimenta-et-al.dat    | 0.71        | $3.8 \times 10^5$ | $5.8 \times 10^6$    | 10%   | 19    |
| [9] Bergstrom et al.         | Bergstrom-SM.dat     | 0.71        | $1.6 \times 10^6$ | $4.6 \times 10^6$    | 5%    | 4     |
| [9] Bergstrom et al.         | Bergstrom-SGL.dat    | 0.71        | $1.6 \times 10^6$ | $4.7 \times 10^6$    | 9%    | 4     |
| [9] Bergstrom et al.         | Bergstrom-SGML.dat   | 0.71        | $1.6 \times 10^6$ | $4.7 \times 10^6$    | 9%    | 4     |
| [9] Bergstrom et al.         | Bergstrom-SGM.dat    | 0.71        | $1.6 \times 10^6$ | $4.7 \times 10^6$    | 9%    | 4     |
| [9] Bergstrom et al.         | Bergstrom-SGS.dat    | 0.71        | $1.6 \times 10^6$ | $4.7 \times 10^6$    | 9%    | 4     |
| [9] Bergstrom et al.         | Bergstrom-WML.dat    | 0.71        | $1.6 \times 10^6$ | $4.7 \times 10^6$    | 9%    | 4     |
| [9] Bergstrom et al.         | Bergstrom-WMM.dat    | 0.71        | $1.6 \times 10^6$ | $4.7 \times 10^6$    | 9%    | 4     |
| [9] Bergstrom et al.         | Bergstrom-WMS.dat    | 0.71        | $1.6 \times 10^6$ | $4.7 \times 10^6$    | 9%    | 4     |
| [9] Bergstrom et al.         | Bergstrom-PL.dat     | 0.71        | $1.6 \times 10^6$ | $4.7 \times 10^6$    | 9%    | 4     |
| [9] Bergstrom et al.         | Bergstrom-PM.dat     | 0.71        | $1.6 \times 10^6$ | $4.7 \times 10^6$    | 9%    | 4     |
| [9] Bergstrom et al.         | Bergstrom-PS.dat     | 0.71        | $1.6 \times 10^6$ | $4.7 \times 10^6$    | 9%    | 4     |

Note: Churchill [1] extracted its measurements from Smith and Walker [2] and Spalding and Chi [3].

The Gebers [5, 6] skin-friction measurements were captured from a graph in Schlichting [7] by measuring the distance from each point to the graph's axes, then scaling to the graph's units using the "Engauge" software.

**Table S2 Sources of convection measurements**

| Source                                    | Filename            | $Pr_\infty$ | $Re \geq$         | $Re \leq$         | $\pm$ | Count |
|-------------------------------------------|---------------------|-------------|-------------------|-------------------|-------|-------|
| [10] Kestin et al.                        | Kestin.csv, group 1 | 0.7         | $3.8 \times 10^4$ | $3.5 \times 10^5$ |       | 13    |
| [10] Kestin et al.                        | Kestin.csv, group 2 | 0.7         | $4.3 \times 10^4$ | $2.9 \times 10^5$ |       | 7     |
| [11] Reynolds et al.                      | Reynolds.csv        | 0.71        | $8.2 \times 10^4$ | $1.1 \times 10^6$ | 4%    | 22    |
| [4] Žukauskas & Šlančiauskas              | UHF.csv, group 2    | 0.71        | $1.1 \times 10^4$ | $8.2 \times 10^5$ | 5%    | 10    |
| [4] Žukauskas & Šlančiauskas              | UHF.csv, group 1    | 0.71        | $1.1 \times 10^4$ | $8.2 \times 10^5$ | 5%    | 10    |
| [4] Žukauskas & Šlančiauskas              | UHF.csv, group 0    | 0.71        | $1.1 \times 10^4$ | $8.2 \times 10^5$ | 5%    | 10    |
| [4] Žukauskas & Šlančiauskas              | UHF.csv, group 4    | 6.57        | $4.0 \times 10^3$ | $2.2 \times 10^5$ | 10%   | 19    |
| [4] Žukauskas & Šlančiauskas              | UHF.csv, group 3    | 6.57        | $5.0 \times 10^3$ | $2.2 \times 10^5$ | 10%   | 15    |
| [4] Žukauskas & Šlančiauskas              | UHF.csv, group 6    | 108.        | $3.0 \times 10^4$ | $3.0 \times 10^5$ | 5%    | 17    |
| [4] Žukauskas & Šlančiauskas              | UHF.csv, group 5    | 257.        | $1.2 \times 10^4$ | $1.1 \times 10^5$ | 5%    | 17    |
| [4] Žukauskas & Šlančiauskas              | ZSCV.csv, group 0   | 0.71        | $1.1 \times 10^5$ | $6.3 \times 10^5$ | 5%    | 16    |
| [4] Žukauskas & Šlančiauskas              | ZSCV.csv, group 3   | 0.71        | $1.7 \times 10^5$ | $7.5 \times 10^5$ | 5%    | 19    |
| [4] Žukauskas & Šlančiauskas              | ZSCV.csv, group 1   | 5.8-7.1     | $1.4 \times 10^6$ | $2.3 \times 10^6$ | 10%   | 5     |
| [4] Žukauskas & Šlančiauskas              | ZSCV.csv, group 4   | 2.9-7.2     | $2.1 \times 10^5$ | $6.4 \times 10^6$ | 10%   | 21    |
| [4] Žukauskas & Šlančiauskas              | ZSCV.csv, group 5   | 2.0-5.8     | $1.8 \times 10^5$ | $1.4 \times 10^6$ | 10%   | 40    |
| [4] Žukauskas & Šlančiauskas              | ZSCV.csv, group 2   | 75-246      | $5.0 \times 10^4$ | $7.0 \times 10^5$ | 5%    | 40    |
| [4] Žukauskas & Šlančiauskas              | ZSCV.csv, group 6   | 80-205      | $1.1 \times 10^5$ | $3.6 \times 10^5$ | 5%    | 11    |
| [4] Žukauskas & Šlančiauskas              | ZSCV.csv, group 7   | 92-317      | $2.7 \times 10^4$ | $7.5 \times 10^5$ | 5%    | 29    |
| present apparatus $\varepsilon = 3.00$ mm | 3mm/mixed-dn.dat    | 0.71        | $2.3 \times 10^3$ | $9.3 \times 10^4$ | 3-7%  | 13    |
| present apparatus $\varepsilon = 1.04$ mm | 1mm/mixed-dn.dat    | 0.71        | $2.0 \times 10^3$ | $6.8 \times 10^4$ | 2-6%  | 14    |

Rough surface convection measurements were obtained from an apparatus built for this investigation, which measured average convection in air at  $2300 < Re < 93000$ . The fields are  $Re$ ,  $Ra$ ,  $\pm\%$ ,  $\theta$ ,  $\psi$ ,  $Pr$ , and  $Nu$ .  $\pm\%$  is the RSS combined measurement uncertainty.

The remaining measurement data-sets were manually entered from tables in the cited works. Several obvious single-digit typographical errors were corrected.

**Table S3 Other data sources**

| Source                       | Filename             | What            | Low  | High  | Count |
|------------------------------|----------------------|-----------------|------|-------|-------|
| [4] Žukauskas & Šlančiauskas | fluids.csv, group 1  | air             | 20°C | 90°C  | 8     |
| present work                 | fluids2.csv, group 1 | air             | 10°C | 100°C | 46    |
| [4] Žukauskas & Šlančiauskas | fluids.csv, group 2  | water           | 20°C | 90°C  | 8     |
| present work                 | fluids2.csv, group 2 | water           | 10°C | 100°C | 46    |
| [4] Žukauskas & Šlančiauskas | fluids.csv, group 3  | transformer oil | 30°C | 120°C | 10    |
| present work                 | fluids2.csv, group 3 | transformer oil | 10°C | 100°C | 46    |

Žukauskas and Šlančiauskas [4] is the source for fluid properties `fluids.csv`. This investigation calculated more accurate fluid properties in `fluids2.csv`, which were used in the error calculations.

## 1. References

- [1] Stuart W. Churchill. Theoretically based expressions in closed form for the local and mean coefficients of skin friction in fully turbulent flow along smooth and rough plates. *International Journal of Heat and Fluid Flow*, 14(3):231 – 239, 1993, doi:10.1016/0142-727X(93)90053-P.
- [2] D. W. Smith and J. D. Walker. Skin friction measurements in incompressible flow. Technical Report R-26, NASA, Washington, DC, 1959.
- [3] D. B. Spalding and S. W. Chi. The drag of a compressible turbulent boundary layer on a smooth flat plate with and without heat transfer. *Journal of Fluid Mechanics*, 18(1):117143, 1964, doi:10.1017/S0022112064000088.
- [4] A. Žukauskas and A. Šlančiauskas. *Heat Transfer in Turbulent Fluid Flows*. Hemisphere Publishing Corp, Washington, DC, 1987.
- [5] F. Gebers. Ein beitrag zur experimentellen ermittlung des wasserwiderstandes gegen bewegte köper. *Schiffbau*, 9:435 – 452, 475 – 485, 1908.
- [6] F. Gebers. Das ähnlichkeitsgesetz für den flächenwiderstand in wasser geradling fortbewegter polierter platten. *Schiffbau*, 22:687 – 930, 1920 - 1921.
- [7] Hermann Schlichting. *Boundary-Layer Theory*. McGraw Hill, New Delhi, seventh edition, 2014. Translated by Kestin, J.
- [8] M. M. Pimenta, R. J. Moffat, and W. M. Kays. *The Turbulent Boundary Layer: An Experimental Study of the Transport of Momentum and Heat with the Effect of Roughness*. Department of Mechanical Engineering, Stanford University, Stanford, CA, USA, 1975.
- [9] D. J. Bergstrom, O. G. Akinlade, and M. F. Tachie. Skin Friction Correlation for Smooth and Rough Wall Turbulent Boundary Layers. *Journal of Fluids Engineering*, 127(6):1146–1153, 04 2005, doi:10.1115/1.2073288.
- [10] J. Kestin, P.F. Maeder, and H.E. Wang. Influence of turbulence on the transfer of heat from plates with and without a pressure gradient. *International Journal of Heat and Mass Transfer*, 3(2):133–154, 1961, doi:https://doi.org/10.1016/0017-9310(61)90076-X.
- [11] W. C. Reynolds, W. M. Kays, and S. J. Kline. Heat transfer in the turbulent incompressible boundary layer, part 4 – effect of location of transition and prediction of heat transfer in a known transition region. Technical Report NASA-MEMO-12-4-58W, NASA, Washington, DC, USA, 1958.
